# Supplementary material
Source: PubMed Central journal article supplement (PMC2396721)
Supplement: 0800194105_Supplemental_PDF.pdf [file 0800194105_Supplemental_PDF.pdf]

# Supporting Information

Vereecken and Schiestl 10.1073/pnas.0800194105

[Movie S1 \(MOV\)](#)

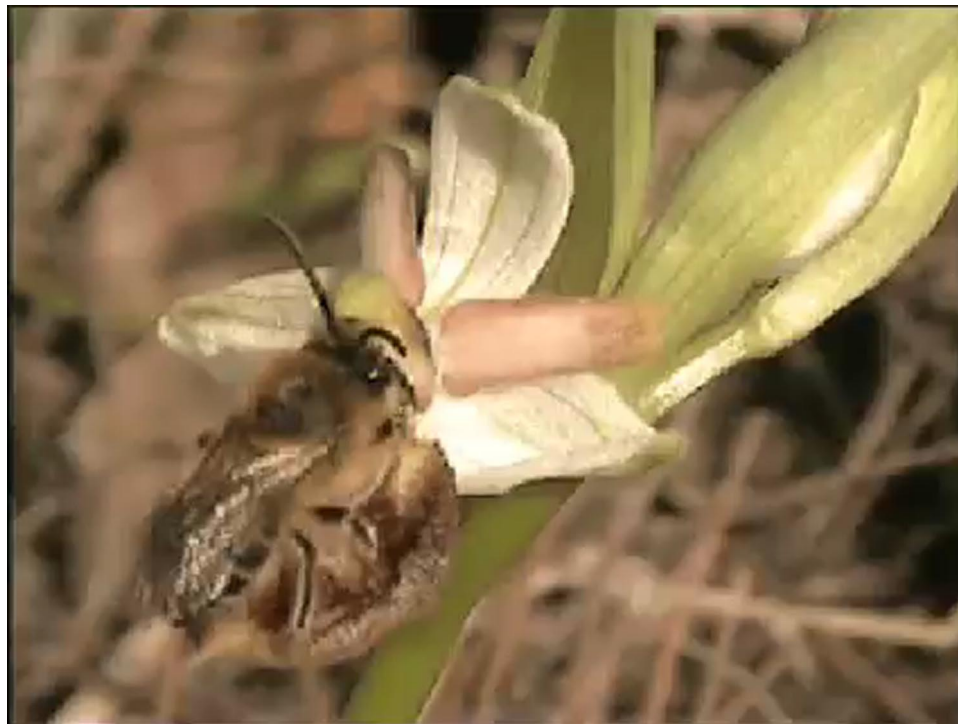

**Movie S1.** Shown is a male bee, *Colletes cunicularius* (Hymenoptera Colletidae), attempting copulation on the flower labellum of the orchid, *Ophrys exaltata* (video by N.J.V.).
